# Supplementary material for: Transgender Women in the Female Category of Sport: Perspectives on Testosterone Suppression and Performance Advantage
Source: Springer Nature journal article supplement (doi:10.1007/s40279-020-01389-3), 2020-12-08
Supplement: MOESM1 [file 18667592]

**Supplementary Table S1** Literature review search details (PubMed accessed 08.03.2020)

**Article title:** Transgender women in the female category of sport: Perspectives on testosterone suppression and performance advantage

**Journal:** Sports Medicine

**Authors:** Emma N. Hilton <sup>1</sup> and Tommy R. Lundberg <sup>2,3</sup>

**Affiliations:**

- 1) Faculty of Biology, Medicine and Health, University of Manchester, Manchester, UK.
- 2) Department of Laboratory Medicine, Division of Clinical Physiology, Karolinska Institutet, Stockholm, Sweden.
- 3) Unit of Clinical Physiology, Karolinska University Hospital, Stockholm, Sweden.

**Correspondence:**

Tommy R. Lundberg, PhD

E-mail: [tommy.lundberg@ki.se](mailto:tommy.lundberg@ki.se)

### Search terms

| Search term 1                                                                                                                                                                                                                                                                           | [AND] | Search term 2                                                                                                                                                                                                                                                   |
|-----------------------------------------------------------------------------------------------------------------------------------------------------------------------------------------------------------------------------------------------------------------------------------------|-------|-----------------------------------------------------------------------------------------------------------------------------------------------------------------------------------------------------------------------------------------------------------------|
| trans [AND] sex [OR] gender<br>[OR] gender identity [OR]<br>(gender [AND] identity)<br>transgender [OR] transgender<br>persons [OR] (transgender<br>[AND] persons)<br>transwoman [OR] (trans [AND]<br>woman)<br>transwomen [OR] (trans [AND]<br>women)<br>transsexual [OR] transsexuals |       | muscle [OR] muscles [OR]<br>strength<br>bone [OR] bones [OR] height<br>body composition [OR] (body<br>[AND] composition)<br>sport [OR] sports [OR]<br>performance<br>exercise [OR] physical activity<br>[OR] (physical [AND] activity)<br>athlete [OR] athletes |

A full list of references is available on request.

### Sorting strategy

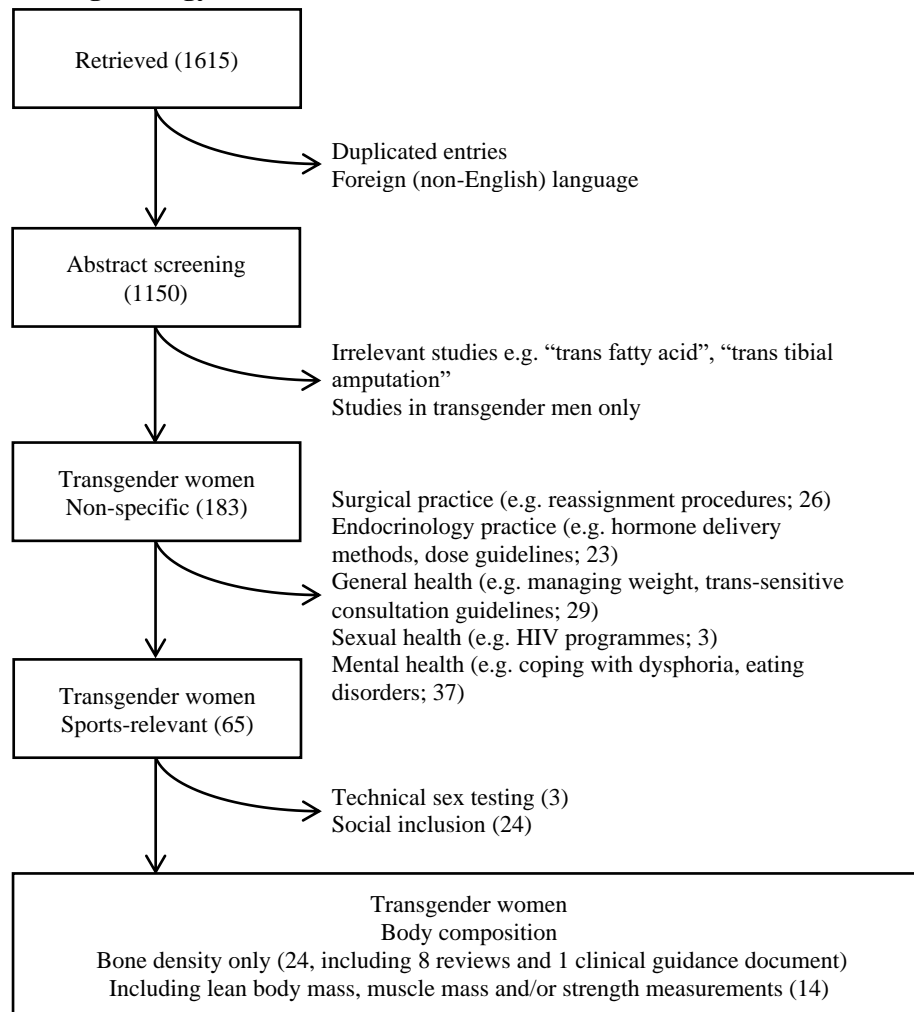

## **Declarations**

**Funding:** None

**Conflicts of interest:** Emma N Hilton and Tommy R Lundberg declare that they have no conflict of interest.

**Authorship contributions:** Both authors (ENH and TRL) were involved in the conception and design of this paper, and both authors drafted, revised and approved the final version of the paper.

**Ethics approval:** Not applicable

**Informed consent:** Not applicable

**Data availability:** Available upon request
